# Supplementary material for: Identification of QTLs Associated with Virulence Related Traits and Drug Resistance in Cryptococcus neoformans
Source: PubMed Central journal article supplement (PMC5015932; doi:10.1534/g3.116.029595), 2016-06-30
Supplement: supp_g3.116.029595_TableS2.pdf [file supp_g3.116.029595_TableS2.pdf]

Table S2: Average phenotype  $\pm$  standard deviation for given genotypic class. The marker closest to the QTL of interest, as indicated by the position (pos) and Chromosome (Chr), was used for the analysis.

| Trait               | Chr | Pos (cM) | Marker   | AA                              | A-                             | A?                             | DD                              | D-                             | D?                             | H                             |
|---------------------|-----|----------|----------|---------------------------------|--------------------------------|--------------------------------|---------------------------------|--------------------------------|--------------------------------|-------------------------------|
| Melanin             | A   | 15.6     | CNA03050 | 38.21 $\pm$ 6.66 <sup>ab</sup>  | 35.83 $\pm$ 7.19 <sup>ab</sup> | 36.70 $\pm$ 7.27 <sup>ab</sup> | 39.08 $\pm$ 4.03 <sup>ab</sup>  | 33.73 $\pm$ 5.55 <sup>ab</sup> | 31.18 $\pm$ 10.14 <sup>b</sup> | 36.16 $\pm$ 8.89 <sup>a</sup> |
|                     | B   | 15.0     | CNB03520 | 36.56 $\pm$ 10.35 <sup>ab</sup> | 31.27 $\pm$ 9.19 <sup>b</sup>  | 39.20 $\pm$ 5.91 <sup>a</sup>  | 30.55 $\pm$ 11.96 <sup>ab</sup> | 32.72 $\pm$ 7.07 <sup>ab</sup> | 33.03 $\pm$ 7.91 <sup>b</sup>  | 38.40 $\pm$ 7.14 <sup>a</sup> |
|                     | G   | 3.6      | CNG01240 | 43.51 <sup>ab</sup>             | 39.82 $\pm$ 4.28 <sup>a</sup>  | 39.40 $\pm$ 5.69 <sup>a</sup>  | 26.39 $\pm$ 8.91 <sup>ab</sup>  | 33.45 $\pm$ 2.80 <sup>ab</sup> | 30.88 $\pm$ 8.61 <sup>b</sup>  | 38.03 $\pm$ 6.40 <sup>a</sup> |
|                     | L   | 0.0      | CNL03990 | 38.32 $\pm$ 5.56 <sup>a</sup>   | 34.22 $\pm$ 7.71 <sup>a</sup>  | 38.05 $\pm$ 5.25 <sup>a</sup>  | 32.84 $\pm$ 7.14 <sup>a</sup>   | 27.43 <sup>a</sup>             | 33.23 $\pm$ 7.39 <sup>a</sup>  | 35.03 $\pm$ 9.69 <sup>a</sup> |
|                     | L   | 9.4      | CNL06810 | 4.98 <sup>a</sup>               | 32.14 <sup>ab</sup>            | 38.05 $\pm$ 5.25 <sup>b</sup>  | 34.38 $\pm$ 5.80 <sup>b</sup>   | 34.87 $\pm$ 7.64 <sup>b</sup>  | 33.23 $\pm$ 7.39 <sup>b</sup>  | 35.29 $\pm$ 9.10 <sup>b</sup> |
| Cell Size           | A   | 35.7     | CNA06130 | 6.63 $\pm$ 0.78 <sup>ac</sup>   | 6.22 $\pm$ 0.86 <sup>ab</sup>  | 6.10 $\pm$ 0.54 <sup>ab</sup>  | 6.42 $\pm$ 0.88 <sup>ab</sup>   | 5.77 $\pm$ 0.67 <sup>b</sup>   | 5.87 $\pm$ 0.76 <sup>bc</sup>  | 6.44 $\pm$ 0.81 <sup>a</sup>  |
|                     | A   | 54.2     | CNA07310 | 6.39 $\pm$ 0.87 <sup>ab</sup>   | 5.85 $\pm$ 0.58 <sup>b</sup>   | 6.10 $\pm$ 0.54 <sup>ab</sup>  | 6.37 $\pm$ 0.83 <sup>ab</sup>   | 6.10 $\pm$ 0.94 <sup>ab</sup>  | 5.87 $\pm$ 0.76 <sup>b</sup>   | 6.48 $\pm$ 0.80 <sup>a</sup>  |
|                     | A   | 64.0     | CNA07990 | 6.59 $\pm$ 1.00 <sup>ab</sup>   | 5.91 $\pm$ 0.68 <sup>b</sup>   | 6.10 $\pm$ 0.54 <sup>ab</sup>  | 5.85 $\pm$ 0.77 <sup>b</sup>    | 5.99 $\pm$ 0.87 <sup>b</sup>   | 5.87 $\pm$ 0.76 <sup>b</sup>   | 6.60 $\pm$ 0.72 <sup>a</sup>  |
|                     | D   | 41.6     | RUM1     | 5.56 $\pm$ 0.68 <sup>ab</sup>   | 5.96 $\pm$ 0.75 <sup>b</sup>   | 5.94 $\pm$ 0.67 <sup>b</sup>   | 6.52 $\pm$ 0.82 <sup>ab</sup>   | 5.85 $\pm$ 0.70 <sup>b</sup>   | 5.99 $\pm$ 0.67 <sup>b</sup>   | 6.57 $\pm$ 0.88 <sup>a</sup>  |
|                     | F   | 1.2      | CNF00290 | 6.52 $\pm$ 0.33 <sup>ab</sup>   | 6.25 $\pm$ 0.77 <sup>ab</sup>  | 6.08 $\pm$ 0.59 <sup>ab</sup>  | 6.08 $\pm$ 0.76 <sup>ab</sup>   | 5.94 $\pm$ 0.69 <sup>b</sup>   | 5.83 $\pm$ 0.78 <sup>b</sup>   | 6.56 $\pm$ 0.81 <sup>a</sup>  |
|                     | I   | 2.6      | CNI01350 | 5.91 $\pm$ 0.62 <sup>ab</sup>   | 5.42 $\pm$ 0.55 <sup>b</sup>   | 6.15 $\pm$ 0.69 <sup>ab</sup>  | 5.79 $\pm$ 1.28 <sup>ab</sup>   | 6.03 $\pm$ 0.39 <sup>ab</sup>  | 5.72 $\pm$ 0.62 <sup>b</sup>   | 6.32 $\pm$ 0.82 <sup>a</sup>  |
| Cell Wall Thickness | A   | 14.6     | CNA02700 | 0.05 $\pm$ 0.00 <sup>abc</sup>  | 0.05 $\pm$ 0.01 <sup>b</sup>   | 0.05 $\pm$ 0.01 <sup>abc</sup> | 0.04 $\pm$ 0.01 <sup>ab</sup>   | 0.05 $\pm$ 0.01 <sup>ac</sup>  | 0.06 $\pm$ 0.01 <sup>c</sup>   | 0.05 $\pm$ 0.01 <sup>ac</sup> |
| Capsule             | A   | 0.0      | CNA00050 | 0.27 $\pm$ 0.28 <sup>ab</sup>   | 0.19 $\pm$ 0.21 <sup>ab</sup>  | 0.22 $\pm$ 0.22 <sup>ab</sup>  | 0.12 $\pm$ 0.19 <sup>ab</sup>   | 0.07 $\pm$ 0.14 <sup>b</sup>   | 0.09 $\pm$ 0.16 <sup>b</sup>   | 0.22 $\pm$ 0.22 <sup>a</sup>  |
|                     | B   | 0.6      | CNB00360 | 0.07 $\pm$ 0.09 <sup>ab</sup>   | 0.19 $\pm$ 0.23 <sup>ab</sup>  | 0.21 $\pm$ 0.23 <sup>ab</sup>  | 0.07 $\pm$ 0.17 <sup>b</sup>    | 0.09 $\pm$ 0.12 <sup>b</sup>   | 0.10 $\pm$ 0.16 <sup>b</sup>   | 0.28 $\pm$ 0.22 <sup>a</sup>  |
|                     | D   | 41.9     | CND06160 | 0.16 $\pm$ 0.14 <sup>ab</sup>   | 0.05 $\pm$ 0.08 <sup>b</sup>   | 0.16 $\pm$ 0.19 <sup>b</sup>   | 0.14 $\pm$ 0.13 <sup>ab</sup>   | 0.12 $\pm$ 0.19 <sup>b</sup>   | 0.10 $\pm$ 0.16 <sup>b</sup>   | 0.29 $\pm$ 0.23 <sup>a</sup>  |
|                     | H   | 0.0      | CNH00030 | 0.24 $\pm$ 0.21 <sup>a</sup>    | 0.20 $\pm$ 0.24 <sup>abc</sup> | 0.20 $\pm$ 0.22 <sup>ab</sup>  | 0.05 $\pm$ 0.12 <sup>bc</sup>   | 0.07 $\pm$ 0.12 <sup>abc</sup> | 0.06 $\pm$ 0.12 <sup>c</sup>   | 0.23 $\pm$ 0.22 <sup>a</sup>  |
|                     | L   | 2.2      | CNL04620 | 0.00 <sup>ab</sup>              | 0.08 $\pm$ 0.14 <sup>ab</sup>  | 0.14 $\pm$ 0.18 <sup>ab</sup>  | 0.01 $\pm$ 0.02 <sup>ab</sup>   | 0.04 $\pm$ 0.04 <sup>ab</sup>  | 0.08 $\pm$ 0.13 <sup>b</sup>   | 0.23 $\pm$ 0.22 <sup>a</sup>  |
| MIC on agar         | A   | 4.2      | CNA00290 | 6.33 $\pm$ 1.15 <sup>abc</sup>  | 6.74 $\pm$ 0.67 <sup>a</sup>   | 6.31 $\pm$ 1.20 <sup>ac</sup>  | 5.11 $\pm$ 1.17 <sup>cd</sup>   | 4.93 $\pm$ 1.21 <sup>bd</sup>  | 4.40 $\pm$ 1.76 <sup>bd</sup>  | 6.62 $\pm$ 0.95 <sup>a</sup>  |
|                     | E   | 7.8      | CNE01630 | 5.75 $\pm$ 1.50 <sup>ab</sup>   | 6.31 $\pm$ 1.14 <sup>ab</sup>  | 6.12 $\pm$ 1.32 <sup>ab</sup>  | 6.07 $\pm$ 1.77 <sup>ab</sup>   | 5.00 $\pm$ 1.15 <sup>ab</sup>  | 5.13 $\pm$ 1.77 <sup>b</sup>   | 6.15 $\pm$ 1.27 <sup>a</sup>  |
|                     | N   | 15.0     | CNN02060 | 5.67 $\pm$ 1.41 <sup>ab</sup>   | 5.46 $\pm$ 1.66 <sup>ab</sup>  | 6.43 $\pm$ 1.10 <sup>b</sup>   | 5.50 $\pm$ 2.12 <sup>ab</sup>   | 5.40 $\pm$ 1.78 <sup>ab</sup>  | 5.89 $\pm$ 1.36 <sup>ab</sup>  | 5.35 $\pm$ 1.81 <sup>a</sup>  |
| MIC in Broth        | A   | 4.2      | CNA00290 | 6.67 $\pm$ 0.58 <sup>a</sup>    | 4.61 $\pm$ 1.24 <sup>a</sup>   | 5.69 $\pm$ 1.14 <sup>a</sup>   | 3.00 $\pm$ 2.55 <sup>abc</sup>  | 2.56 $\pm$ 3.00 <sup>b</sup>   | 1.00 $\pm$ 2.34 <sup>c</sup>   | 4.63 $\pm$ 2.17 <sup>a</sup>  |
|                     | A   | 59.8     | CNA07470 | 4.45 $\pm$ 1.97 <sup>ab</sup>   | 4.00 $\pm$ 2.65 <sup>a</sup>   | 5.69 $\pm$ 1.14 <sup>a</sup>   | 3.70 $\pm$ 2.54 <sup>ab</sup>   | 2.04 $\pm$ 2.42 <sup>bc</sup>  | 1.00 $\pm$ 2.34 <sup>c</sup>   | 4.79 $\pm$ 2.23 <sup>a</sup>  |
|                     | C   | 9.4      | CNC06110 | 1.60 $\pm$ 1.95 <sup>a</sup>    | 1.80 $\pm$ 1.92 <sup>a</sup>   | 4.08 $\pm$ 2.44 <sup>a</sup>   | 3.33 $\pm$ 2.66 <sup>a</sup>    | 4.00 $\pm$ 4.12 <sup>a</sup>   | 2.73 $\pm$ 2.88 <sup>a</sup>   | 4.10 $\pm$ 2.65 <sup>a</sup>  |

Superscript letters refer to significant differences between groups based on Tukey's HSD at  $p < 0.05$
